# Supplementary material
Source: publisher site journal article supplement (https://www.dovepress.com/article/472595)
Supplement: Supplementary file 1 [file get_supplementary_file.php]

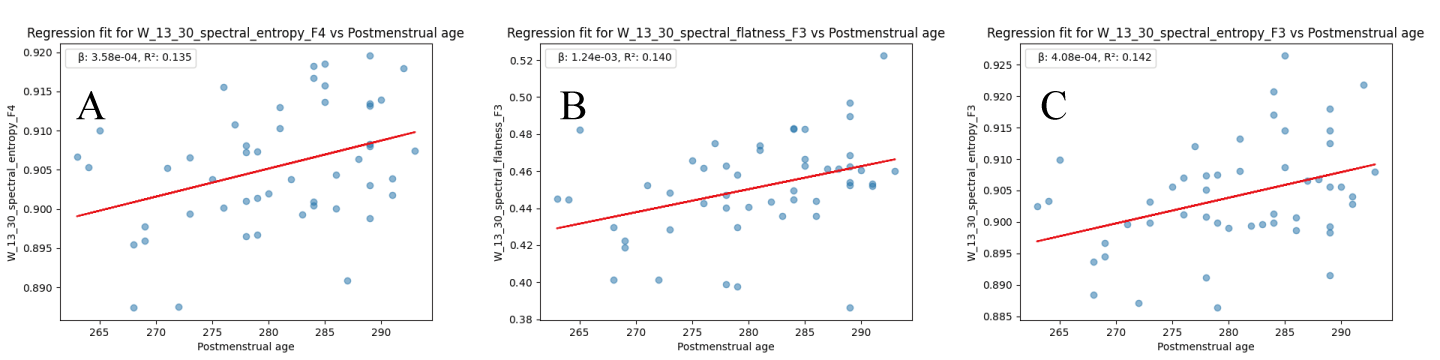


**Supplementary figure 1.** Variations in wakefulness QEEG Parameters with PMA. The regression curves between QEEG indicators during the awakening period and PMA are shown. The horizontal axis represents PMA, and the vertical axis represents QEEG indicators. Each blue solid dot represents a subject. The red line represents the fitted regression line. The legend in the upper left corner of each plot indicates the β value and R², with specific values available in ***Supplementary Table 4***. The parameters for each sub-figure are as follows: ***A***: W_13_30_spectral_entropy_F4; ***B***: W_13_30_spectral_flatness_F3; ***C***: W_13_30_spectral_entropy_F3.


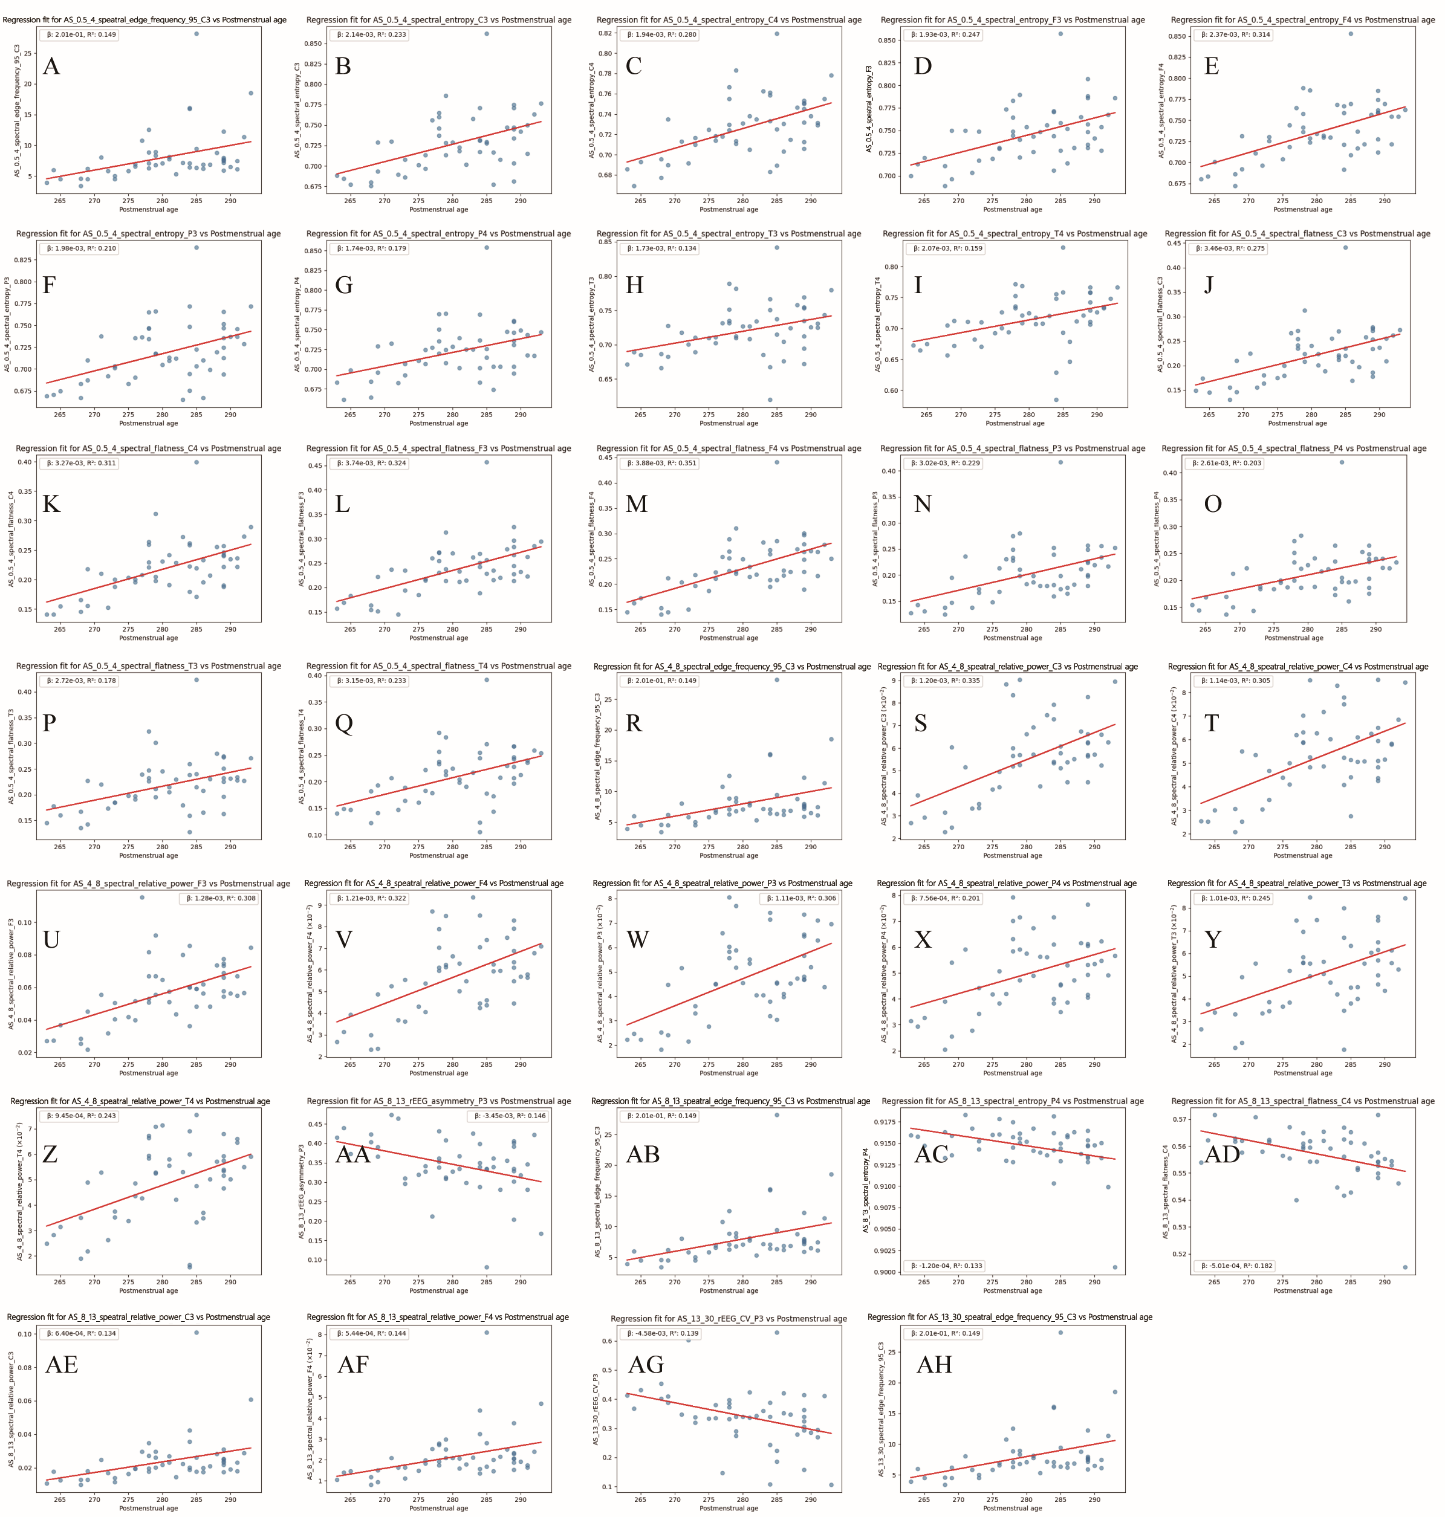
**Supplementary figure 2.** Variations in AS Period QEEG Parameters with PMA. The regression curves between QEEG indicators during the AS period and PMA are shown. The horizontal axis represents PMA, and the vertical axis represents QEEG indicators. Each blue solid dot represents a subject. The red line represents the fitted regression line. The legend in the upper left corner of each plot indicates the β value and R², with specific values available in ***Supplementary Table 5***. The parameters for each sub-figure are as follows: ***A***: AS_0.5_4_spectral_edge_frequency_95_C3; ***B***: AS_0.5_4_spectral_entropy_C3; ***C***: AS_0.5_4_spectral_entropy_C4; ***D***: AS_0.5_4_spectral_entropy_C4; ***E***: AS_0.5_4_spectral_entropy_F4; ***F***: AS_0.5_4_spectral_entropy_P3; ***G***: AS_0.5_4_spectral_entropy_P3; ***H***: AS_0.5_4_spectral_entropy_T3; ***I***: AS_0.5_4_spectral_entropy_T4; ***J***: AS_0.5_4_spectral_flatness_C3; ***K***: AS_0.5_4_spectral_flatness_C4; ***L***: AS_0.5_4_spectral_flatness_F3; ***M***: AS_0.5_4_spectral_flatness_F4; ***N***: AS_0.5_4_spectral_flatness_P3; ***O***: AS_0.5_4_spectral_flatness_P4; ***P***: AS_0.5_4_spectral_flatness_T3; ***Q***: AS_0.5_4_spectral_flatness_T4; ***R***: AS_4_8_spectral_edge_frequency_95_C3; ***S***: AS_4_8_spectral_relative_power_C3; ***T***: AS_4_8_spectral_relative_power_C4; ***U***: AS_4_8_spectral_relative_power_F3; ***V***: AS_4_8_spectral_relative_power_F4; ***W***: AS_4_8_spectral_relative_power_P3; ***X***: AS_4_8_spectral_relative_power_P4; ***Y***: AS_4_8_spectral_relative_power_T3; ***Z***: AS_4_8_spectral_relative_power_T4; ***AA***: AS_8_13_rEEG_asymmetry_P3; ***AB***: AS_8_13_spectral_edge_frequency_95_C3; ***AC***: AS_8_13_spectral_entropy_P4; ***AD***: AS_8_13_spectral_flatness_C4; ***AE***: AS_8_13_spectral_relative_power_C3; ***AF***: AS_8_13_spectral_relative_power_F4; ***AG***: AS_13_30_rEEG_CV_P3; ***AH***: AS_13_30_spectral_edge_frequency_95_C3.


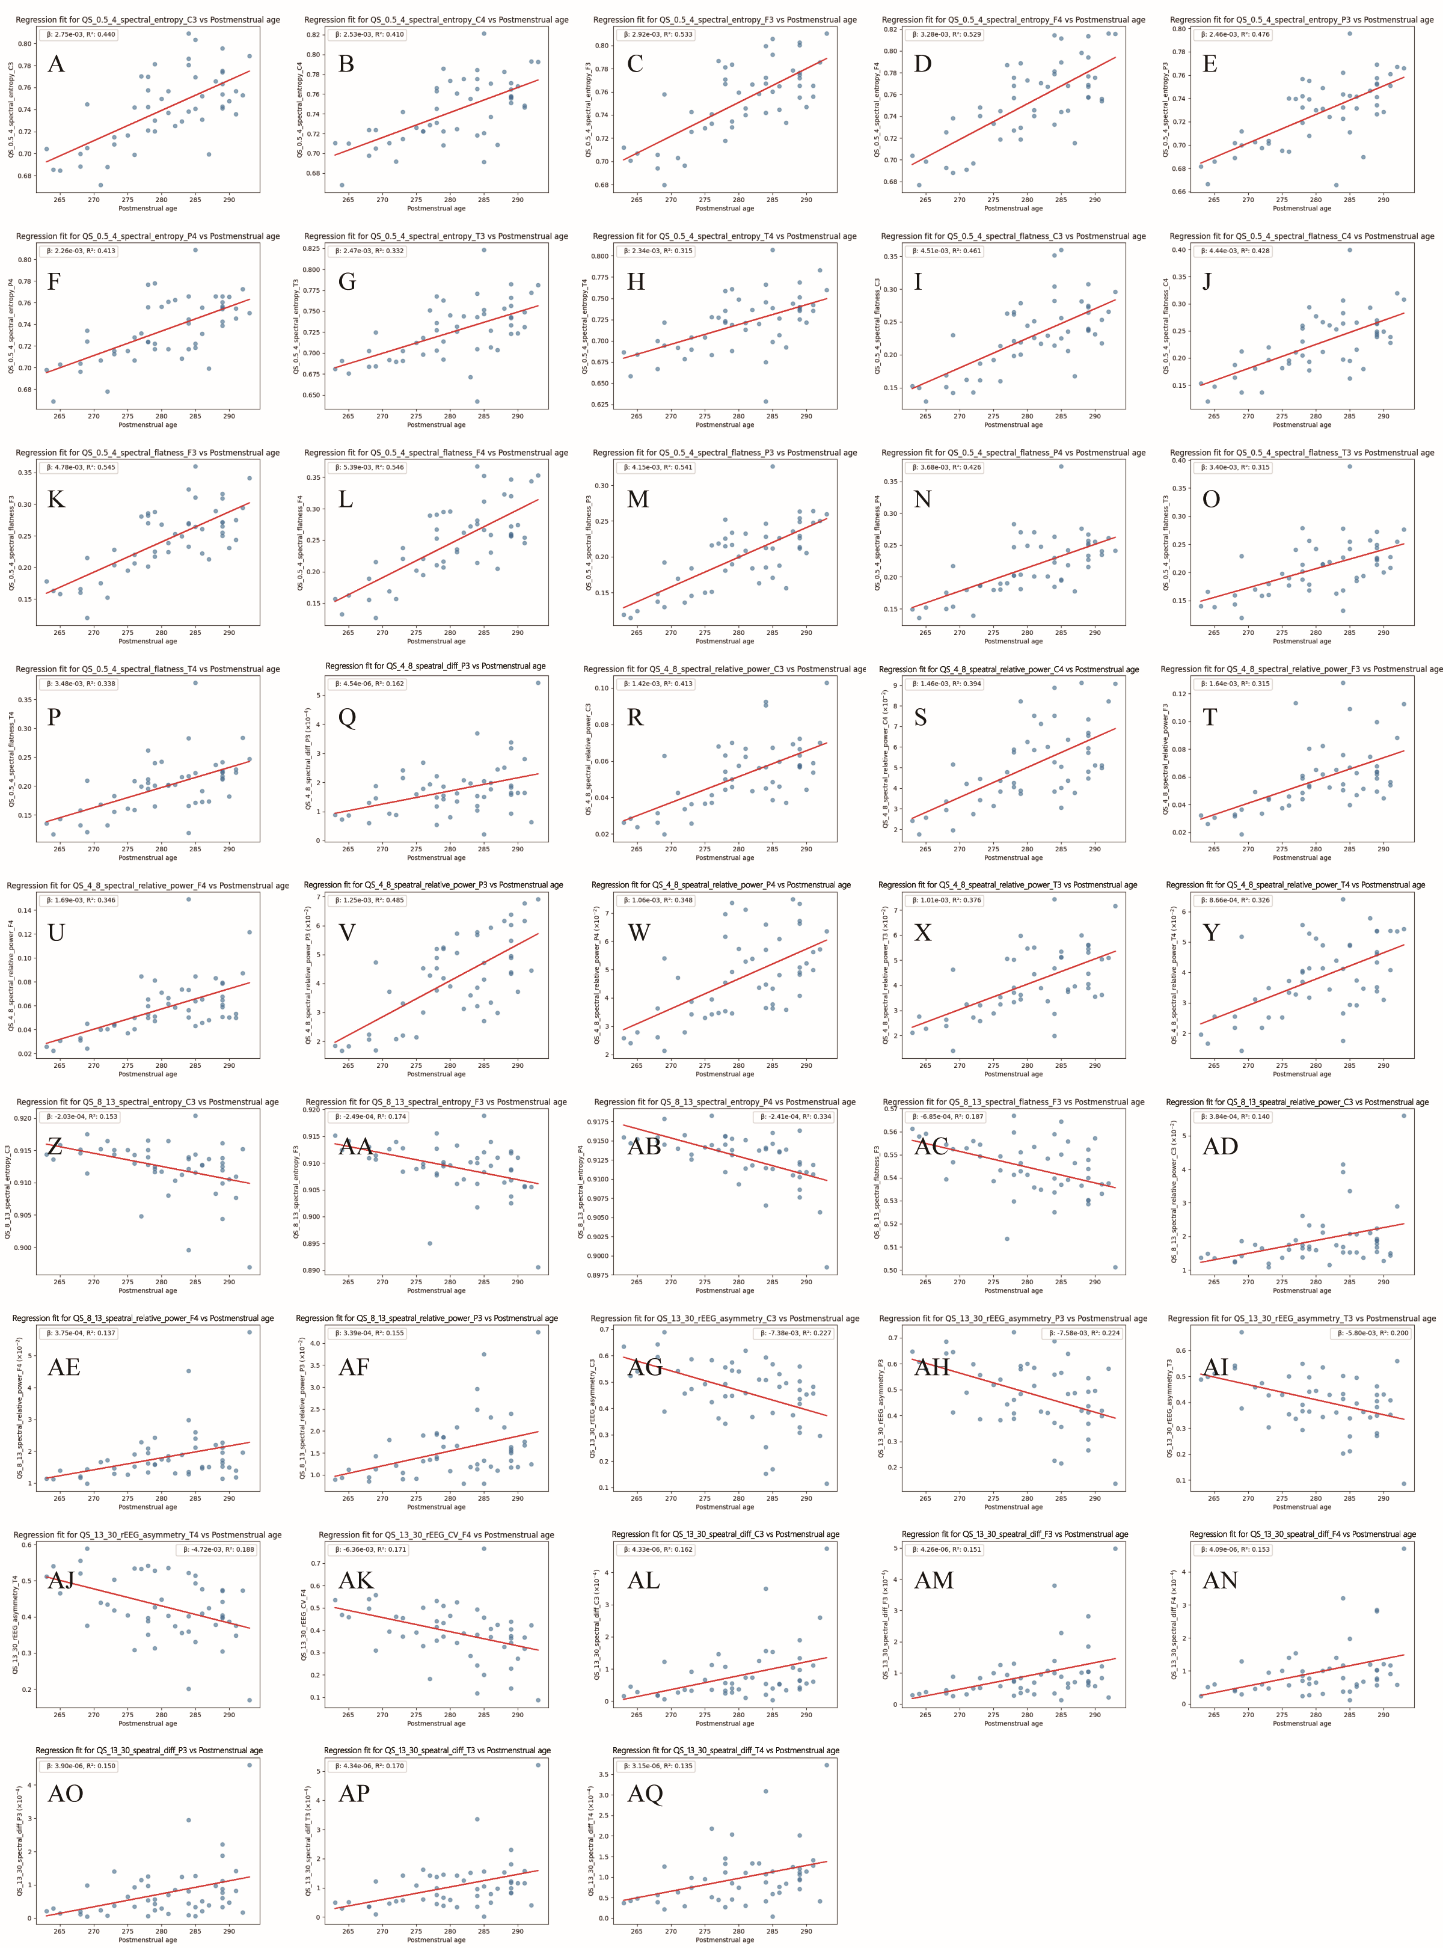


**Supplementary figure 3.** Variations in QS Period QEEG Parameters with PMA. The regression curves between QEEG indicators during the QS period and PMA are shown. The horizontal axis represents PMA, and the vertical axis represents QEEG indicators. Each blue solid dot represents a subject. The red line represents the fitted regression line. The legend in the upper left corner of each plot indicates the β value and R², with specific values available in ***Supplementary Table 6***. The parameters for each sub-figure are as follows: ***A***: QS_0.5_4_spectral_entropy_C3; ***B***: QS_0.5_4_spectral_entropy_C4; ***C***: QS_0.5_4_spectral_entropy_F3; ***D***: QS_0.5_4_spectral_entropy_F4; ***E***: QS_0.5_4_spectral_entropy_P3; ***F***: QS_0.5_4_spectral_entropy_P4; ***G***: QS_0.5_4_spectral_entropy_T3; ***H***: QS_0.5_4_spectral_entropy_T4; ***I***: QS_0.5_4_spectral_flatness_C3; ***J***: QS_0.5_4_spectral_flatness_C4; ***K***: QS_0.5_4_spectral_flatness_F3; ***L***: QS_0.5_4_spectral_flatness_F4; ***M***: QS_0.5_4_spectral_flatness_P3; ***N***: QS_0.5_4_spectral_flatness_P4; ***O***: QS_0.5_4_spectral_flatness_T3; ***P***: QS_0.5_4_spectral_flatness_T4; ***Q***: QS_4_8_spectral_diff_P3; ***R***: QS_4_8_spectral_relative_power_C3; ***S***: QS_4_8_spectral_relative_power_C4; ***T***: QS_4_8_spectral_relative_power_F3; ***U***: QS_4_8_spectral_relative_power_F4; ***V***: QS_4_8_spectral_relative_power_P3; ***W***: QS_4_8_spectral_relative_power_P4; ***X***: QS_4_8_spectral_relative_power_T3; ***Y***: QS_4_8_spectral_relative_power_T4; ***Z***: QS_8_13_spectral_entropy_C3; ***AA***: QS_8_13_spectral_entropy_F3; ***AB***: QS_8_13_spectral_entropy_P4; ***AC***: QS_8_13_spectral_flatness_F3; ***AD***: QS_8_13_spectral_relative_power_C3; ***AE***: QS_8_13_spectral_relative_power_F4; ***AF***: QS_8_13_spectral_relative_power_P3; ***AG***: QS_13_30_rEEG_asymmetry_C3; ***AH***: QS_13_30_rEEG_asymmetry_P3; ***AI***: QS_13_30_rEEG_asymmetry_T3; ***AJ***: QS_13_30_rEEG_asymmetry_T4; ***AK***: QS_13_30_rEEG_CV_F4; ***AL***: QS_13_30_spectral_diff_C3; ***AM***: QS_13_30_spectral_diff_F3; ***AN***: QS_13_30_spectral_diff_F4; ***AO***: QS_13_30_spectral_diff_P3; ***AP***: QS_13_30_spectral_diff_T3; ***AQ***: QS_13_30_spectral_diff_T4.

**Supplementary table 1.** The top 20 parameters capable of distinguishing between AS and QS.

| **Indicator** | **AUC** | **AUC 95%CI** | **Best Cutoff** |
| --- | --- | --- | --- |
| 8_13_spectral_diff_F3 | 0.88 | (4.74e-5, 6.68e-4) | 3.29e-4 |
| 13_30_spectral_diff_C4 | 0.87 | (1.50e-5, 4.43e-4) | 9.79e-5 |
| 8_13_spectral_diff_F4 | 0.87 | (1.07e-4, 6.84e-4) | 3.45e-4 |
| 8_13_spectral_diff_C4 | 0.87 | (5.22e-5, 6.81e-4) | 2.80e-4 |
| 13_30_spectral_diff_T3 | 0.86 | (3.02e-5, 4.05e-4) | 1.65e-4 |
| 13_30_spectral_diff_F4 | 0.86 | (2.40e-5, 4.43e-4) | 1.04e-4 |
| 8_13_spectral_diff_T3 | 0.86 | (5.25e-5, 6.48e-4) | 3.23e-4 |
| 8_13_spectral_diff_C3 | 0.85 | (2.62e-5, 6.99e-4) | 3.01e-4 |
| 13_30_spectral_diff_F3 | 0.84 | (2.22e-5, 4.83e-4) | 1.09e-4 |
| 4_8_spectral_diff_F3 | 0.83 | (2.50e-5, 4.83e-4) | 2.99e-4 |
| 13_30_spectral_diff_C3 | 0.82 | (1.04e-5, 4.42e-4) | 7.50e-5 |
| 8_13_spectral_diff_T4 | 0.82 | (7.19e-5, 5.54e-4) | 2.92e-4 |
| 13_30_spectral_relative_power_T4 | 0.81 | (5.42e-3, 7.17e-2) | 1.10e-2 |
| 8_13_spectral_diff_P4 | 0.81 | (6.73e-5, 6.49e-4) | 2.64e-4 |
| 8_13_spectral_diff_P3 | 0.81 | (3.36e-5, 6.87e-4) | 1.89e-4 |
| 13_30_spectral_diff_T4 | 0.80 | (2.76e-5, 3.72e-4) | 1.35e-4 |
| 13_30_spectral_diff_P3 | 0.80 | (6.29e-6, 4.59e-4) | 6.46e-5 |
| 13_30_spectral_relative_power_T3 | 0.79 | (6.02e-3, 8.73e-2) | 1.42e-2 |
| 13_30_spectral_diff_P4 | 0.79 | (1.25e-5, 3.79e-4) | 8.20e-5 |
| 13_30_spectral_relative_power_C4 | 0.79 | (8.60e-3, 7.18e-2) | 1.77e-2 |

Definition of abbreviations: AUC = area under the receiver operator characteristics curve; CI = confidence interval; Cutoff values associated with minimal false-negative and positive results are shown. Data are expressed with a 95% CI.

**Supplementary table 2.** The top 20 parameters capable of distinguishing between AS and W.

| **Indicator** | **AUC** | **AUC 95%CI** | **Best Cutoff** |
| --- | --- | --- | --- |
| 4_8_spectral_diff_C4 | 0.93 | (6.43e-6, 4.02e-4) | 1.34e-4 |
| 4_8_spectral_diff_C3 | 0.93 | (5.28e-6, 4.18e-4) | 1.64e-4 |
| 13_30_spectral_relative_power_P4 | 0.91 | (2.62e-3, 6.44e-2) | 1.42e-2 |
| 4_8_spectral_diff_P4 | 0.91 | (3.19e-6, 4.32e-4) | 9.22e-5 |
| 4_8_spectral_diff_T3 | 0.91 | (6.99e-6, 4.16e-4) | 1.70e-4 |
| 13_30_spectral_relative_power_C4 | 0.90 | (2.58e-3, 7.18e-2) | 1.56e-2 |
| 4_8_spectral_diff_F3 | 0.90 | (6.04e-6, 4.83e-4) | 2.14e-4 |
| 8_13_spectral_relative_power_P4 | 0.90 | (3.21e-3, 3.40e-2) | 1.37e-2 |
| 4_8_spectral_diff_P3 | 0.90 | (4.43e-6, 3.63e-4) | 1.35e-4 |
| 4_8_spectral_diff_F4 | 0.89 | (1.00e-5, 4.86e-4) | 2.47e-4 |
| 0.5_4_spectral_edge_frequency_95_P4 | 0.89 | (2.07, 15.8) | 4.77 |
| 4_8_spectral_edge_frequency_95_P4 | 0.89 | (2.07, 15.8) | 4.77 |
| 8_13_spectral_edge_frequency_95_P4 | 0.89 | (2.07, 15.8) | 4.77 |
| 13_30_spectral_edge_frequency_95_P4 | 0.89 | (2.07, 15.8) | 4.77 |
| 8_13_spectral_relative_power_C4 | 0.89 | (3.22e-3, 4.75e-2) | 1.50e-2 |
| 0.5_4_spectral_diff_C3 | 0.89 | (1.09e-6, 9.03e-5) | 1.47e-5 |
| 0.5_4_spectral_diff_F3 | 0.89 | (2.46e-6, 1.40e-4) | 2.96e-5 |
| 8_13_spectral_diff_T3 | 0.88 | (2.47e-5, 6.06e-4) | 3.02e-4 |
| 8_13_spectral_diff_P4 | 0.88 | (5.11e-6, 6.49e-4) | 2.31e-4 |
| 0.5_4_spectral_edge_frequency_95_C4 | 0.88 | (2.0, 16.6) | 5.83 |

Definition of abbreviations: AUC = area under the receiver operator characteristics curve; CI = confidence interval; Cutoff values associated with minimal false-negative and positive results are shown. Data are expressed with a 95% CI.

**Supplementary table 3.** The top 20 parameters capable of distinguishing between QS and W.

| **Indicator** | **AUC** | **AUC 95%CI** | **Best Cutoff** |
| --- | --- | --- | --- |
| 0.5_4_spectral_diff_P4 | 0.94 | (1.23e-6, 1.55e-4) | 2.56e-5 |
| 0.5_4_spectral_diff_C4 | 0.93 | (1.49e-6, 1.50e-4) | 2.47e-5 |
| 0.5_4_spectral_diff_C3 | 0.92 | (1.09e-6, 1.51e-4) | 1.71e-5 |
| 0.5_4_spectral_diff_F4 | 0.92 | (1.59e-6, 2.06e-4) | 2.58e-5 |
| 0.5_4_spectral_diff_T4 | 0.92 | (1.41e-6, 1.25e-4) | 3.00e-5 |
| 0.5_4_spectral_diff_P3 | 0.91 | (1.12e-6, 1.40e-4) | 1.35e-5 |
| 0.5_4_spectral_diff_F3 | 0.91 | (2.46e-6, 2.03e-4) | 2.60e-5 |
| 0.5_4_spectral_diff_T3 | 0.89 | (1.49e-6, 1.41e-4) | 2.72e-5 |
| 0.5_4_spectral_edge_frequency_50_C4 | 0.88 | (0.67, 1.3) | 0.83 |
| 4_8_spectral_edge_frequency_50_C4 | 0.88 | (0.67, 1.3) | 0.83 |
| 8_13_spectral_edge_frequency_50_C4 | 0.88 | (0.67, 1.3) | 0.83 |
| 13_30_spectral_edge_frequency_50_C4 | 0.88 | (0.67, 1.3) | 0.83 |
| 4_8_spectral_diff_C4 | 0.88 | (6.43e-6, 3.20e-4) | 1.33e-4 |
| 4_8_spectral_diff_P4 | 0.88 | (3.19e-6, 4.20e-4) | 1.13e-4 |
| 0.5_4_spectral_entropy_C4 | 0.87 | (0.63, 0.82) | 0.71 |
| 0.5_4_spectral_edge_frequency_50_F4 | 0.86 | (0.67, 1.63) | 0.80 |
| 4_8_spectral_edge_frequency_50_F4 | 0.86 | (0.67, 1.63) | 0.80 |
| 8_13_spectral_edge_frequency_50_F4 | 0.86 | (0.67, 1.63) | 0.80 |
| 13_30_spectral_edge_frequency_50_F4 | 0.86 | (0.67, 1.63) | 0.80 |
| 0.5_4_spectral_edge_frequency_50_P3 | 0.85 | (0.7, 1.05) | 0.80 |

Definition of abbreviations: AUC = area under the receiver operator characteristics curve; CI = confidence interval; Cutoff values associated with minimal false-negative and positive results are shown. Data are expressed with a 95% CI.

**Supplementary table 4.** The variation pattern of QEEG parameters during AS across postmenstrual age

| **Spectral power** | **Signal features** | **R2** | **Beta** | **P value** |
| --- | --- | --- | --- | --- |
| 0.5_4 | spectral_edge_frequency_95_C3 | 0.15 | 0.2014 | <0.01 |
|  | spectral_entropy_C3 | 0.23 | 0.0021 | <0.01 |
|  | spectral_entropy_C4 | 0.28 | 0.0019 | <0.01 |
|  | spectral_entropy_F3 | 0.25 | 0.0019 | <0.01 |
|  | spectral_entropy_F4 | 0.31 | 0.0024 | <0.01 |
|  | spectral_entropy_P3 | 0.21 | 0.002 | <0.01 |
|  | spectral_entropy_P4 | 0.18 | 0.0017 | <0.01 |
|  | spectral_entropy_T3 | 0.13 | 0.0017 | <0.01 |
|  | spectral_entropy_T4 | 0.16 | 0.0021 | <0.01 |
|  | spectral_flatness_C3 | 0.28 | 0.0035 | <0.01 |
|  | spectral_flatness_C4 | 0.31 | 0.0033 | <0.01 |
|  | spectral_flatness_F3 | 0.32 | 0.0037 | <0.01 |
|  | spectral_flatness_F4 | 0.35 | 0.0039 | <0.01 |
|  | spectral_flatness_P3 | 0.23 | 0.003 | <0.01 |
|  | spectral_flatness_P4 | 0.2 | 0.0026 | <0.01 |
|  | spectral_flatness_T3 | 0.18 | 0.0027 | <0.01 |
|  | spectral_flatness_T4 | 0.23 | 0.0031 | <0.01 |
| 4_8 | spectral_edge_frequency_95_C3 | 0.15 | 0.2014 | <0.01 |
|  | spectral_relative_power_C3 | 0.34 | 0.0012 | <0.01 |
|  | spectral_relative_power_C4 | 0.31 | 0.0011 | <0.01 |
|  | spectral_relative_power_F3 | 0.31 | 0.0013 | <0.01 |
|  | spectral_relative_power_F4 | 0.32 | 0.0012 | <0.01 |
|  | spectral_relative_power_P3 | 0.31 | 0.0011 | <0.01 |
|  | spectral_relative_power_P4 | 0.2 | 0.0008 | <0.01 |
|  | spectral_relative_power_T3 | 0.25 | 0.001 | <0.01 |
|  | spectral_relative_power_T4 | 0.24 | 0.0009 | <0.01 |
| 8_13 | rEEG_asymmetry_P3 | 0.15 | -0.0035 | <0.01 |
|  | spectral_edge_frequency_95_C3 | 0.13 | 0.2014 | <0.01 |
|  | spectral_entropy_P4 | 0.13 | -0.0001 | <0.01 |
|  | spectral_flatness_C4 | 0.18 | -0.0005 | <0.01 |
|  | spectral_relative_power_C3 | 0.13 | 0.0006 | <0.01 |
|  | spectral_relative_power_F4 | 0.14 | 0.0005 | <0.01 |
| 13_30 | rEEG_CV_P3 | 0.14 | -0.0046 | <0.01 |
|  | spectral_edge_frequency_95_C3 | 0.15 | 0.2014 | <0.01 |

**Supplementary table 5.** The variation pattern of QEEG parameters during QS across postmenstrual age

| **Spectral power** | **Signal features** | **R2** | **Beta** | **P value** |
| --- | --- | --- | --- | --- |
| 0.5_4 | spectral_entropy_C3 | 0.44 | 0.0028 | <0.01 |
|  | spectral_entropy_C4 | 0.41 | 0.0025 | <0.01 |
|  | spectral_entropy_F3 | 0.53 | 0.0029 | <0.01 |
|  | spectral_entropy_F4 | 0.53 | 0.0033 | <0.01 |
|  | spectral_entropy_P3 | 0.48 | 0.0025 | <0.01 |
|  | spectral_entropy_P4 | 0.41 | 0.0023 | <0.01 |
|  | spectral_entropy_T3 | 0.33 | 0.0025 | <0.01 |
|  | spectral_entropy_T4 | 0.32 | 0.0023 | <0.01 |
|  | spectral_flatness_C3 | 0.46 | 0.0045 | <0.01 |
|  | spectral_flatness_C4 | 0.43 | 0.0044 | <0.01 |
|  | spectral_flatness_F3 | 0.55 | 0.0048 | <0.01 |
|  | spectral_flatness_F4 | 0.55 | 0.0054 | <0.01 |
|  | spectral_flatness_P3 | 0.54 | 0.0042 | <0.01 |
|  | spectral_flatness_P4 | 0.43 | 0.0037 | <0.01 |
|  | spectral_flatness_T3 | 0.32 | 0.0034 | <0.01 |
|  | spectral_flatness_T4 | 0.34 | 0.0035 | <0.01 |
| 4_8 | spectral_diff_P3 | 0.16 | 4.54E-06 | <0.01 |
|  | spectral_relative_power_C3 | 0.413 | 0.0014 | <0.01 |
|  | spectral_relative_power_C4 | 0.4 | 0.0015 | <0.01 |
|  | spectral_relative_power_F3 | 0.32 | 0.0016 | <0.01 |
|  | spectral_relative_power_F4 | 0.35 | 0.0017 | <0.01 |
|  | spectral_relative_power_P3 | 0.5 | 0.0013 | <0.01 |
|  | spectral_relative_power_P4 | 0.35 | 0.0011 | <0.01 |
|  | spectral_relative_power_T3 | 0.36 | 0.001 | <0.01 |
|  | spectral_relative_power_T4 | 0.33 | 0.0009 | <0.01 |
| 8_13 | spectral_entropy_C3 | 0.15 | -0.0002 | <0.01 |
|  | spectral_entropy_F3 | 0.17 | -0.0002 | <0.01 |
|  | spectral_entropy_P4 | 0.33 | -0.0002 | <0.01 |
|  | spectral_flatness_F3 | 0.19 | -0.0007 | <0.01 |
|  | spectral_relative_power_C3 | 0.14 | 0.0004 | <0.01 |
|  | spectral_relative_power_F4 | 0.14 | 0.0004 | <0.01 |
|  | spectral_relative_power_P3 | 0.16 | 0.0003 | <0.01 |
| 13_30 | rEEG_asymmetry_C3 | 0.23 | -0.0074 | <0.01 |
|  | rEEG_asymmetry_P3 | 0.22 | -0.0076 | <0.01 |
|  | rEEG_asymmetry_T3 | 0.2 | -0.0058 | <0.01 |
|  | rEEG_asymmetry_T4 | 0.19 | -0.0047 | <0.01 |
|  | rEEG_CV_F4 | 0.17 | -0.0064 | <0.01 |
|  | spectral_diff_C3 | 0.16 | 4.33E-06 | <0.01 |
|  | spectral_diff_F3 | 0.15 | 4.27E-06 | <0.01 |
|  | spectral_diff_F4 | 0.15 | 4.09E-06 | <0.01 |
|  | spectral_diff_P3 | 0.15 | 3.90E-06 | <0.01 |
|  | spectral_diff_T3 | 0.17 | 4.34E-06 | <0.01 |
|  | spectral_diff_T4 | 0.14 | 3.15E-06 | <0.01 |
